# Supplementary material for: Cell wall traits as potential resources to improve resistance of durum wheat against Fusarium graminearum
Source: PubMed Central journal article supplement (PMC4298115; doi:10.1186/s12870-014-0369-1), 2015-01-19
Supplement: 12870_2014_369_MOESM1_ESM.pdf [file 12870_2014_369_MOESM1_ESM.pdf]

>*Triticum aestivum* cultivar Chinese *WheatPME1-A* gene

ATGAGTAAAGGTGCGATCATCGGCGCGTTCGACCGTCCTGGTGGTGGCGGT  
CGTCGCCCGCGTGTGCGTCTCCTTCAAGGGCAACGGCGGCGACAAGG  
GCGATGGGGAGCTCACCACCTCCGTCAAGTCCGTCAAGGCCTTCTGCCAG  
CCCATGGACTACAAGGAGACGTGCGAGGCGGAGCTGACCAAGGTGGGCGG  
CAACGCCACGTGCGCGACGGAGCTCGCCAAGGCCATCTTCGAGGTGACCT  
CGGAGAAGATCAGGAAGGCCATCAGCGAGTCGGCCACCCTGGAGGAGCTC  
AAGAGCGACCCGCGCACGTGCGGGGCCCTCGAGAAGTGAAGGAGCTGCT  
GGAGTACGCCATCGAGGACCTCAAGACCACCTTCGACCGCCTCGGCGGCT  
TCGAGATGACCGACTTCAACAAGGCCCGCCGACCTCAAGACCTGGCTC  
AGCGCCGCGCTCACCTACCAGGAGACCTGCCTCGACGGCTTCGCCAACAC  
CACCACCGACGCCGCCCAAGATGCGCGGCGCGCTCAACGCCTCCCAGG  
AGCTCACCGAGGACATCCTCGCGTGGTTCGACAGTTCTCCGCCTCCCTC  
GGCAGCCTCAACATCGGGAAGAGGAGGCTGCTAGGGGAGGAGGACGGCAT  
GCCTTACTGGATGAACGACGGGAAGAGGCGGCTGCTGGAGGCCGAGCCCT  
CCGACCCGAGTTCAAGCCCAACGTACCCGTGCGCGCTGACGGCAGCGGC  
GACTTCAAGACCATCAAGGAGCGCTCGCAAAGGTGCCGCCCAAGAGCGC  
CTCCATGTACGTATGTACATCAAGGCCGGCACCTACAAGGAGTACGTCT  
CCGTGGGCCGCCCTATCACCAACCTCGTTCGTCATCGGCGACGGCGACGAC  
AAGACCATCATCACCGGCAACAAGAACTTCAAGATGAACATCACCAACAA  
GGACACCGCAACCATGGGAGGCAATCGGGAACGGCTTCTTCATGAAGGGC  
GTGAGGGTGGAGAACACGGCGGGGGCCGAGAACCACCAGGCCGTGGCACT  
GCGGGTGCAGAGCGACACAGGCGCTCTTCTACCAGTGTACTTCGACGGGT  
ACCAAGACACGCTCTACACCCACGCGCAACGGCAGTTCTTCCGCGACTGC  
ACCGTCACCGGCACCATCGACTTCATCTTCGGCAACTCCCAGGTGGTCAT  
CCAGAAGTGCCTCATCCTGCCGCGCAAGGCCATGGACAACCAGCTCAACA  
TCATCACCGCGCAAGGGCGGGCGGAGAAGCGCTCCGTGCGGGGACCGTC  
ATGCACAACAACACCATCGAGCCGACCCGGACTTCAAGGACTCGACGGG  
CAAGATCAAGACCTACCTGGCGCGCCATGGAAGGAGTACTCTAGGACCA  
TCTACATCCAGAACGAGATCGGCGCCTTCATCGACCCCAAGGGCTGGCTC  
GAGTGAACGGCGACTTCGCCCTCGAGACCCTCTTCTACGCCGAGGTGGA  
GAACACCGGGGCCGGCGCGATATGAGCCAGCGCGCCAAGTGGGGCGGCA  
TCAAGACTGTACCTACGCTGACGCACAAAAGGAGTACACCGTCGAGGCC  
TTCATCCAGGGCGAGCAGTTCATCCCCAAGTACGGCGTGCCCTACATCCC  
GGGGCTCCTCCCGAGTCGGAGGCGGGGAGGG

>*Triticum aestivum* cultivar Chinese *WheatPME1-A* predicted protein

MSKGAIIGASTVLVVAVVAVAVCVVSVFKNGGGDKDGEELTTSVKSVKAFQC  
PMDYKETCEAELTKVGGNATSPELAKAIFEVTSEKIRKAISESATLEEL  
KSDPRTSGALENCKELLEAYIEDLKTTFDRLGGFEMTDFNKAADLKTWL  
SAALTYQETCLDGFANTTTDAAAKMRGALNASQELTEDILAVVDQFSASL  
GSLNIGKRRLLEEDGMPYWMNDGKRRLLEAEPSAPEFKPNVTVAADGSG  
DFKTIKEALAKVPPKSASMYVMIKAGTYKEYVSVGRPITNLVVIIGDGD  
KTIITGNKNFKMNIITKDTATMGGNRERLLHEGREGGEHGGGREPPGRGT  
ADTLYTHAQRQFFRDCTVTGTIDFIFGNSQVVIQNCLILPRKPMDNQLNI  
ITAQGRREKRSVGGTVMHNNTEIHPHDFKDSTGKIKTYLARPWKEYSRTI  
YIQNEIGAFIDPKGWLEWNGDFALETIFYAEVENTGPGADMSQRAKWGGI  
KTVTYADAQKEYTVEAFIQGEQFIPKYGVPIPLLP

> *Triticum aestivum* cultivar Chinese *WheatPME1-B* gene

ATGAGCAAAGGCGCCATAATCGGCGCGTTCGACCGTCCTGGTGGTGGCGGT  
CGTCGCCCGCGTCTGCGTCTCCTTCAAGGGCAACGGCGGCGACAAGG  
GCGATGGGGAGCTCACCACCTCCGTCAAGTCCGTCAAGGCCTTCTGCCAG  
CCCATGGACTACAAGGAGACGTGCGAGGCGGAGCTGACCAAGGTGGGCGG  
CAACGCCACGTGCGGACGGAGCTCGCCAAGGCCATCTTCGAGGTCACCT  
CGGAGAAGATCAGGAAGGCCATCAGCGAGTCGGCCACCCTGGAGGAGCTC  
AAGAGCGACCCGCGCACGTGCGGGGCCCCTCGAGAAGTGAAGGAGCTGCT  
GGAGTACGGCATCGAGGACCTCAAGACCACCTTCGACCGCCTCGGCGGCT  
TCGAGATGACCGACTTCAACAAGGCCGCGCCGACCTCAAGACCTGGCTC  
AGCGCCGCGCTCACCTACCAGGAGACCTGCCTCGACGGCTTCGCCAACAC  
CACCACCGACGCCGCCCAAGATGCGCGGCGCGCTCAACGCCTCCCAGG  
AGCTCACCAGGACATCCTCGCGTGGTTCGACAGTTCTCCGCCTCCCTC  
GGCAGCCTCAACATCGGGAAGAGGAGGCTGCTAGGGGAGGAGGACGGCAT  
GCCTTACTGGATGAACGACGGGAAGAGGCGGCTGCTGGAGGCCGAGCCCT  
CCGACCCGAGTTCAGCCCAACGTACCGTCGCGCTGACGGCAGCGGC  
GACTTCAAGACCATCAAGGAGCGCTCGCAAAGGTGCCGCCCAAGAGCGC  
CTCCATGTACGTATGTACATCAAGGCCGGCACCTACAAGGAGTACGTCT  
CCGTGGGCGCCCTATCACCAACCTCGTCGTATCGGCGACGGCGACGAC  
AAGACCATCATCACCGGCAACAAGAACTTCAAGATGAACATCACCAACAA  
AGACACCGCAACCATGGGAGGCGATCGGGAACGGCTTCTTCATGAAGGGC  
GTGAGGGTGGAGAACACGGCGGGGCGGAGAACACCAGGCCGTGGCGCT  
GCGGGTGCAGAGCGACACGGCCGTCTTCTACCAGTGTACTTCGACGGGT  
ACCAAGACACGCTCTACACCCACGCGCAACGGCAGTTCTTCCGCGACTGC  
ACCATCACCGGCACCATCGACTTCATCTTCGGCAACTCCCAGGTGGTCAT  
CCAGAAGTGCCTCATCCTGCCGCGCAAGCCCATGGACAACCAGCTCAACA  
TCATCACCGCGCAAGGGCGCCGCGGAGAAGCGCTCCGTGCGGGGACCGTC  
ATGCACAACAACACCATCGAGCCGACCCCGACTTCAAGGACTCGACGGG  
CAAGATCAAGACCTACCTGGCGCGCCCATGGAAGGAGTACTCCAGGACCA  
TCTACATCCAGAACGAGATCGGCGCCTTCATCGACCCCAAGGGCTGGCTC  
GAGTGAACGGCGACTTCGCCCTCGAGACCCTCTTCTACGCCGAGGTGGA  
GAACACCGGGCCCGCGCCGACATGAGCCAGCGCGCCAAGTGGGGCGGCA  
TCAAGACTGTACCTACGCCGACGCGCAGAAGGAGTACACCGTCGAGGCC  
TTCATCCAGGGCGAGCAGTTCATCCCAAGTACGGCGTGCCCTTCATCCC  
GGGGCTCCTCCCGCAGTCGGAGGCGGGGAGGG

> *Triticum aestivum* cultivar Chinese *WheatPME1-B* predicted protein

MSKGAIIGASTVLVVAVVAAVCVVSFKNGGDKDGELETTSVKSVKAFQC  
PMDYKETCEAELTKVGGNATSPELAKAIFEVTSKIRKAISESATLEEL  
KSDPRTSGALENCKELLEYAIEDLKTTFDRLGGFEMTDFNKAADLKTWL  
SAALTYQETCLDGFANTTTDAAAKMRGALNASQELTEDILAVVDQFSASL  
GSLNIGKRRLLEEDGMPYWMNDGKRRLLLEAEPSAPEFKPNVTVAADGSG  
DFKTIKEALAKVPPKSASMYVMIKAGTYKEYVSVGRPITNLVVIIGDGD  
KTIITGNKNFKMNIITKDTATMGGDRERLLHEGREGGEHGGREPPGRGA  
ADTLYTHAQRQFFRDCTITGTIDFIFGNSQVVIQNCLILPRKPMDNQLNI  
ITAQGRREKRSVGGTVMHNNITIEPHPDFKDSTGKIKTYLARPWKEYSRTI  
YIQNEIGAFIDPKGWLEWNGDFALETIFYAEVENTGPGADMSQRAKWGGI  
KTVTYADAQKEYTVEAFIQEQFIPKYGVPI PGLLP

>*Triticum aestivum* cultivar Chinese *WheatPME1-D* gene

```
ATGAGTAAAGGTGCGATCATCGGCGCGTCCGACCGTCTGGTGGTGGCGGT
CGTCGCGCCCGTGTGCGTCTGTCTTCAAGGGCAACGGCGCGACAAGG
GCGATGGGGAGCTCACCACCTCCGTCAAGTCCGTCAAGGCCTTCTGCCAG
CCCATGGACTACAAGGAGACGTGCGAGGCGGAGCTGACCAAGGTGGGCGG
CAACGCCACGTGCGCGACGGAGCTCGCCAAGGCCATCTTCGAGGTGACCT
CGGAGAAGATCAGGAAGGCCATCAGCGAGTCGGCCACCCTGGAGGAGCTC
AAGAGCGACCCGCGCACGTGCGGGGCCCTCGAGAAGTGAAGGAGCTGCT
GGAGTACGCCATCGAGGACCTCAAGACCACCTTCGACCGCTCGGCGGT
TCGAGATGACCGACTTCAACAAGCCCGCCCGACCTCAAGACCTGGCTC
AGCGCCGCGCTCACCTACCAGGAGACCTGCCTCGACGGCTTCGCCAACAC
CACCACCGACCGCCGCCAAGATGCGCGGCGCGCTCAACGCCCTCCAGG
AGCTCACCGAGGACATCCTCGCGTGGTTCGACAGTCTCCGCCCTCCCTC
GGCAGCCTCAACATCGGGAAGAGGAGGCTGCTAGGGGAGGAGGACGGCAT
GCCTTACTGGATGAACGACGGGAAGAGGCGGCTGCTGGAGGCCGAGCCCT
CGCACCCGAGTTCAAGCCCAACGTCACCGTCGCGCTGACGGCAGCGGC
GACTTCAAGACATCAAGGAGGCGCTCGCAAAGGTGCCGCCAAGAGCGC
CTCCATGTACGTATGTACATCAAGGCCGGCACCTACAAGGAGTACGTCT
CCGTGGGCGCCCTATCACCACCTCGTCTCATCGGCGACGGCGACGAC
AAGACCATCATCACCGGCAACAAGAAGTCAAGATGAACATCACCACCAA
GGACACCGCAACCATGGGAGGCAATCGGGAACGGCTTCTTCATGAAGGGC
GTGAGGGTGGAGAACACGGCGGGGGCCGAGAACCACCAGGCCGTGGCACT
GCGGGTGCAGAGCGACACGAGCCGTCTTCTACCAGTGTACTTTCGACGGGT
ACCAAGACACGCTCTACACCCACGCGCAACGGCAGTCTTCCGCGACTGC
ACCGTCACCGGCACCATCGACTTCATCTTCCGCAACTCCCAGGTGGTCAT
CCAGAAGTGCCTCATCCTGCGCGCAAGCCCATGGACAACCAGCTCAACA
TCATCACC CGCAAGGGCGGCGGAGAAGCGCTCCGTGCGGGGACCGTTC
ATGCACAACAACACCATCGAGCCGACCCGGACTTCAAGGACTCGACGGG
CAAGATCAAGACCTACCTGGCGCGCCATGGAAGGAGTACTCTAGGACCA
TCTACATCCAGAACGAGATCGGCGCCTTCATCGACCCCAAGGGCTGGCTC
GAGTGAACGGCGACTTTCGCCCTCGAGACCCTCTTCTACGCCGAGGTGGA
GAACACCGGGCCCGGCGCGGATATGAGCCAGCGCGCCAAGTGGGGCGGCA
TCAAGACTGTACCTACGCTGACGCACAAAAGGAGTACACCGTCGAGGCC
TTCATCCAGGGCGAGCAGTTCATCCCAAGTACGGCGTGCCTTACATCCC
GGGGCTCCTCCCGCAGTCGGAGGCGGGGAGGG
```

>*Triticum aestivum* cultivar Chinese *WheatPME1-D* predicted protein

```
MSKGAIIGASTVLVVAVVAAVCVVSFKNGGDKDGELETTSVKS VKAFQC
PMDYKETCEAELTKVGGNATSPELAKAIFEVTSEKIRKAISESATLEEL
KSDPRTSGALENCKELLEAYAIEDLKTTFDRLGGFEMTDFNKAADLKTWL
SAALTYQETCLDGFANTTTDAAKMRGALNASQELTEDILAVVDQFSASL
GSLNIGKRRLLEEDGMPYWMNDGKRRLLEAEPSAPEFKPNVTVAADGSG
DFKTIKEALAKVPPKSASMYVMIKAGTYKEYVSVGRPITNLVVI GDGDD
KTIITGNKNFKMNIITKDTATMGGNRERLLHEGREGGEHGGREPPGRGT
ADTLYTHAQRQFFRDCTVTGTIDFIFGNSQVVIQNCLILPRKPMDNQLNI
ITAQGRREKRSVGGTVMHNNTIEPHPDFKDGSTGKIKTYLARPWKEYSRTI
YIQNEIGAFIDPKGWLEWNGDFALETFLFYAEVENTGPGADMSQRAKWGGI
KTVTYADAQKEYTVEAFIQGEQFIPKYGVPIYI PGLLP
```

**Figure S1.** *WheatPME1* gene and protein sequences. Fasta sequences of hexaploid cv Chinese Spring *WheatPME1-A*, *WheatPME1-B* and *WheatPME1-D* genes and encoded polypeptides.
