# Supplementary material for: Cell wall traits as potential resources to improve resistance of durum wheat against Fusarium graminearum
Source: PubMed Central journal article supplement (PMC4298115; doi:10.1186/s12870-014-0369-1), 2015-01-19
Supplement: 12870_2014_369_MOESM2_ESM.pdf [file 12870_2014_369_MOESM2_ESM.pdf]

*Wheat PME1-A* ATGAGTAAAGGTGCGATCATCGGCGCGTCGACCGTCTGGTGGTGGCGGT 50  
*Wheat PME1-D* ATGAGTAAAGGTGCGATCATCGGCGCGTCGACCGTCTGGTGGTGGCGGT 50  
*Wheat PME1-B* ATGAGCAAAGGCGCATAATCGGCGCGTCGACCGTCTGGTGGTGGCGGT 50  
 \*\*\*\*\* \*\* \* \* \*\*\*\*\*

*Wheat PME1-A* CGTCGCCGCCGTGTGCGTCGTGTCTTCAAGGGCAACGGCGGCGACAAGG 100  
*Wheat PME1-D* CGTCGCCGCCGTGTGCGTCGTGTCTTCAAGGGCAACGGCGGCGACAAGG 100  
*Wheat PME1-B* CGTCGCCGCCGTGTGCGTCGTGTCTTCAAGGGCAACGGCGGCGACAAGG 100  
 \*\*\*\*\*

*Wheat PME1-A* GCGATGGGGAGCTCACCACCTCCGTCAAGTCCGTCAAGGCCCTTCTGCCAG 150  
*Wheat PME1-D* GCGATGGGGAGCTCACCACCTCCGTCAAGTCCGTCAAGGCCCTTCTGCCAG 150  
*Wheat PME1-B* GCGATGGGGAGCTCACCACCTCCGTCAAGTCCGTCAAGGCCCTTCTGCCAG 150  
 \*\*\*\*\*

*Wheat PME1-A* CCCATGGACTACAAGGAGACGTGCGAGGCGGAGCTGACCAAGGTGGGCGG 200  
*Wheat PME1-D* CCCATGGACTACAAGGAGACGTGCGAGGCGGAGCTGACCAAGGTGGGCGG 200  
*Wheat PME1-B* CCCATGGACTACAAGGAGACGTGCGAGGCGGAGCTGACCAAGGTGGGCGG 200  
 \*\*\*\*\*

*Wheat PME1-A* CAACGCCACGTGCGCCAGCGAGCTCGCCAAGGCCATCTTCGAGGTGACCT 250  
*Wheat PME1-D* CAACGCCACGTGCGCCAGCGAGCTCGCCAAGGCCATCTTCGAGGTGACCT 250  
*Wheat PME1-B* CAACGCCACGTGCGCCAGCGAGCTCGCCAAGGCCATCTTCGAGGTGACCT 250  
 \*\*\*\*\*

*Wheat PME1-A* CGGAGAAGATCAGGAAGGCCATCAGCGAGTCGGCCACCCTGGAGGAGCTC 300  
*Wheat PME1-D* CGGAGAAGATCAGGAAGGCCATCAGCGAGTCGGCCACCCTGGAGGAGCTC 300  
*Wheat PME1-B* CGGAGAAGATCAGGAAGGCCATCAGCGAGTCGGCCACCCTGGAGGAGCTC 300  
 \*\*\*\*\*

*Wheat PME1-A* AAGAGCGACCCGCGCACGTGCGGGGCCCTCGAGAAGTCAAGGAGCTGCT 350  
*Wheat PME1-D* AAGAGCGACCCGCGCACGTGCGGGGCCCTCGAGAAGTCAAGGAGCTGCT 350  
*Wheat PME1-B* AAGAGCGACCCGCGCACGTGCGGGGCCCTCGAGAAGTCAAGGAGCTGCT 350  
 \*\*\*\*\*

*Wheat PME1-A* GGAGTACGCCATCGAGGACCTCAAGACCACCTTCGACCGCCTCGGCGGCT 400  
*Wheat PME1-D* GGAGTACGCCATCGAGGACCTCAAGACCACCTTCGACCGCCTCGGCGGCT 400  
*Wheat PME1-B* GGAGTACGCCATCGAGGACCTCAAGACCACCTTCGACCGCCTCGGCGGCT 400  
 \*\*\*\*\*

*Wheat PME1-A* TCGAGATGACCGACTTCAACAAGGCCGCCGCGACCTCAAGACCTGGCTC 450  
*Wheat PME1-D* TCGAGATGACCGACTTCAACAAGGCCGCCGCGACCTCAAGACCTGGCTC 450  
*Wheat PME1-B* TCGAGATGACCGACTTCAACAAGGCCGCCGCGACCTCAAGACCTGGCTC 450  
 \*\*\*\*\*

*Wheat PME1-A* AGCGCCGCGCTCACCTACCAGGAGACCTGCCTCGACGGCTTCGCCAACAC 500  
*Wheat PME1-D* AGCGCCGCGCTCACCTACCAGGAGACCTGCCTCGACGGCTTCGCCAACAC 500  
*Wheat PME1-B* AGCGCCGCGCTCACCTACCAGGAGACCTGCCTCGACGGCTTCGCCAACAC 500  
 \*\*\*\*\*

*Wheat PME1-A* CACCACCGACGCCGCCCAAGATGCGCGGCGCGCTCAACGCCCTCCCAGG 550  
*Wheat PME1-D* CACCACCGACGCCGCCCAAGATGCGCGGCGCGCTCAACGCCCTCCCAGG 550  
*Wheat PME1-B* CACCACCGACGCCGCCCAAGATGCGCGGCGCGCTCAACGCCCTCCCAGG 550  
 \*\*\*\*\*

*Wheat PME1-A* AGCTCACCGAGGACATCCTCGCCGTGGTCGACCAGTTCTCCGCCTCCCTC 600  
*Wheat PME1-D* AGCTCACCGAGGACATCCTCGCCGTGGTCGACCAGTTCTCCGCCTCCCTC 600  
*Wheat PME1-B* AGCTCACCGAGGACATCCTCGCCGTGGTCGACCAGTTCTCCGCCTCCCTC 600  
 \*\*\*\*\*

*Wheat PME1-A* GGCAGCCTCAACATCGGGAAGAGGAGGCTGCTAGGGGAGGAGGACGGCAT 648  
*Wheat PME1-D* GGCAGCCTCAACATCGGGAAGAGGAGGCTGCTAGGGGAGGAGGACGGCAT 648  
*Wheat PME1-B* GGCAGCCTCAACATCGGGAAGAGGAGGCTGCTAGGGGAGGAGGACGGCAT 650  
 \*\*\*\*\*

*Wheat PME1-A* GCCTTACTGGATGAACGACGGGAAGAGGCGGCTGCTGGAGGCCGAGCCCT 698  
*Wheat PME1-D* GCCTTACTGGATGAACGACGGGAAGAGGCGGCTGCTGGAGGCCGAGCCCT 698  
*Wheat PME1-B* GCCTTACTGGATGAACGACGGGAAGAGGCGGCTGCTGGAGGCCGAGCCCT 700  
 \*\*\*\*\*

*Wheat PME1-A* CCGCACC **C**GAGTTCAAGCCCAACGTCACCGTCGCCGCTGACGGCAGCGGC 748  
*Wheat PME1-D* CCGCACC **C**GAGTTCAAGCCCAACGTCACCGTCGCCGCTGACGGCAGCGGC 748  
*Wheat PME1-B* CCGCACC **G**GAGTTCAAGCCCAACGTCACCGTCGCCGCTGACGGCAGCGGC 750  
 \*\*\*\*\*

*Wheat PME1-A* GACTTCAAGACCATCAAGGAGGCGCTCGCAAAGGTGCCGCCAAGAGCGC 798  
*Wheat PME1-D* GACTTCAAGACCATCAAGGAGGCGCTCGCAAAGGTGCCGCCAAGAGCGC 798  
*Wheat PME1-B* GACTTCAAGACCATCAAGGAGGCGCTCGCAAAGGTGCCGCCAAGAGCGC 800  
 \*\*\*\*\*

*Wheat PME1-A* CTCCATGTACGTCATGTACATCAAGGCCGGCACCTACAAGGAGTACGTCT 848  
*Wheat PME1-D* CTCCATGTACGTCATGTACATCAAGGCCGGCACCTACAAGGAGTACGTCT 848  
*Wheat PME1-B* CTCCATGTACGTCATGTACATCAAGGCCGGCACCTACAAGGAGTACGTCT 850  
 \*\*\*\*\*

*Wheat PME1-A* CCGTGGGCCGCCCTATCACCAACCTCGTCGTCATCGGCGACGGCGACGAC 898  
*Wheat PME1-D* CCGTGGGCCGCCCTATCACCAACCTCGTCGTCATCGGCGACGGCGACGAC 898  
*Wheat PME1-B* CCGTGGGCCGCCCTATCACCAACCTCGTCGTCATCGGCGACGGCGACGAC 900  
 \*\*\*\*\*

*Wheat PME1-A* AAGACCATCATCACCGCAACAAGAACTTCAAGATGAACATCACACCAA 948  
*Wheat PME1-D* AAGACCATCATCACCGCAACAAGAACTTCAAGATGAACATCACACCAA 948  
*Wheat PME1-B* AAGACCATCATCACCGCAACAAGAACTTCAAGATGAACATCACACCAA 950  
 \*\*\*\*\*

*Wheat PME1-A* **G**GACACCGCAACCATGGGAGGCAATCGGGAACGGCTTCTTCATGAAGGGC 998  
*Wheat PME1-D* **G**GACACCGCAACCATGGGAGGCAATCGGGAACGGCTTCTTCATGAAGGGC 998  
*Wheat PME1-B* **A**GACACCGCAACCATGGGAGGCGATCGGGAACGGCTTCTTCATGAAGGGC 1000  
 \*\*\*\*\*

*Wheat PME1-A* GTGAGGGTGGAGAACACGGCGGGGGCCGAGAACCACCAGCCGTGGC**A**CT 1048  
*Wheat PME1-D* GTGAGGGTGGAGAACACGGCGGGGGCCGAGAACCACCAGCCGTGGC**A**CT 1048  
*Wheat PME1-B* GTGAGGGTGGAGAACACGGCGGGGGCCGAGAACCACCAGCCGTGGC**G**CT 1050  
 \*\*\*\*\*

*Wheat PME1-A* GCGGGTGCAGAGCGACCAGGCCGTCTTCTACCAGTGCTACTTCGACGGGT 1098  
*Wheat PME1-D* GCGGGTGCAGAGCGACCAGGCCGTCTTCTACCAGTGCTACTTCGACGGGT 1098  
*Wheat PME1-B* GCGGGTGCAGAGCGACCAGGCCGTCTTCTACCAGTGCTACTTCGACGGGT 1100  
 \*\*\*\*\*

*Wheat PME1-A* ACCAAGACACGCTCTACACCCACGCGCAACGGCAGTTCTTCCGCGACTGC 1148  
*Wheat PME1-D* ACCAAGACACGCTCTACACCCACGCGCAACGGCAGTTCTTCCGCGACTGC 1148  
*Wheat PME1-B* ACCAAGACACGCTCTACACCCACGCGCAACGGCAGTTCTTCCGCGACTGC 1150  
 \*\*\*\*\*

*Wheat PME1-A* ACC**G**TCACCGGCACCATCGACTTCATCTTCGGCAACTCCAGGTGGTCAT 1198  
*Wheat PME1-D* ACC**G**TCACCGGCACCATCGACTTCATCTTCGGCAACTCCAGGTGGTCAT 1198  
*Wheat PME1-B* ACC**A**TCACCGGCACCATCGACTTCATCTTCGGCAACTCCAGGTGGTCAT 1200  
 \*\*\*\*\*

*Wheat PME1-A* CCAGAAGTGCCTCATCCTGCCGCGCAAGCCCATGGACAACCAGCTCAACA 1248  
*Wheat PME1-D* CCAGAAGTGCCTCATCCTGCCGCGCAAGCCCATGGACAACCAGCTCAACA 1248  
*Wheat PME1-B* CCAGAAGTGCCTCATCCTGCCGCGCAAGCCCATGGACAACCAGCTCAACA 1250  
 \*\*\*\*\*

*Wheat PME1-A* TCATCACC GCGCAAGGGCG**G**CGCGAGAAGCGCTCCGTCGGGGGCACCGTC 1298  
*Wheat PME1-D* TCATCACC GCGCAAGGGCG**G**CGCGAGAAGCGCTCCGTCGGGGGCACCGTC 1298  
*Wheat PME1-B* TCATCACC GCGCAAGGGCG**C**CGCGAGAAGCGCTCCGTCGGGGGCACCGTC 1300  
 \*\*\*\*\*

*Wheat PME1-A* ATGCACAACAACACCATCGAGCCGCACCC**G**GACTTCAAGGACTCGACGGG 1348  
*Wheat PME1-D* ATGCACAACAACACCATCGAGCCGCACCC**G**GACTTCAAGGACTCGACGGG 1348  
*Wheat PME1-B* ATGCACAACAACACCATCGAGCCGCACCC**C**GACTTCAAGGACTCGACGGG 1350  
 \*\*\*\*\*

*Wheat PME1-A* CAAGATCAAGACCTACCTGGCGCG**G**CCATGGAAGGAGTACTCT**A**GGACCA 1398  
*Wheat PME1-D* CAAGATCAAGACCTACCTGGCGCG**G**CCATGGAAGGAGTACTCT**A**GGACCA 1398  
*Wheat PME1-B* CAAGATCAAGACCTACCTGGCGCG**C**CCATGGAAGGAGTACTCT**C**AGGACCA 1400  
 \*\*\*\*\*

```

WheatPME1-A      TCTACATCCAGAACGAGATCGGGCGCCTTCATCGACCCCAAGGGCTGGCTC 1448
WheatPME1-D      TCTACATCCAGAACGAGATCGGGCGCCTTCATCGACCCCAAGGGCTGGCTC 1448
WheatPME1-B      TCTACATCCAGAACGAGATCGGGCGCCTTCATCGACCCCAAGGGCTGGCTC 1450
*****

WheatPME1-A      GAGTGGAACGGCGACTTCGCCCTCGAGACCCTCTTCTACGCCGAGGTGGA 1498
WheatPME1-D      GAGTGGAACGGCGACTTCGCCCTCGAGACCCTCTTCTACGCCGAGGTGGA 1498
WheatPME1-B      GAGTGGAACGGCGACTTCGCCCTCGAGACCCTCTTCTACGCCGAGGTGGA 1500
*****

WheatPME1-A      GAACACCGGGCCCGGCGCCGATATGAGCCAGCGCGCCAAGTGGGGCGGCA 1548
WheatPME1-D      GAACACCGGGCCCGGCGCCGATATGAGCCAGCGCGCCAAGTGGGGCGGCA 1548
WheatPME1-B      GAACACCGGGCCCGGCGCCGACATGAGCCAGCGCGCCAAGTGGGGCGGCA 1550
*****

WheatPME1-A      TCAAGACTGTCACCTACGCTGACGCACAAAGGAGTACACCGTCGAGGCC 1598
WheatPME1-D      TCAAGACTGTCACCTACGCTGACGCACAAAGGAGTACACCGTCGAGGCC 1598
WheatPME1-B      TCAAGACTGTCACCTACGCCGACGCGCAGAAAGGAGTACACCGTCGAGGCC 1600
*****

WheatPME1-A      TTCATCCAGGGCGAGCAGTTCATCCCCAAGTACGGCGTGCCCTACATCCC 1648
WheatPME1-D      TTCATCCAGGGCGAGCAGTTCATCCCCAAGTACGGCGTGCCCTACATCCC 1648
WheatPME1-B      TTCATCCAGGGCGAGCAGTTCATCCCCAAGTACGGCGTGCCCTTCATCCC 1650
*****

WheatPME1-A      GGGGCTCCTCCCAGTCGGAGGCGGGGAGGG 1680
WheatPME1-D      GGGGCTCCTCCCAGTCGGAGGCGGGGAGGG 1680
WheatPME1-B      GGGGCTCCTCCCAGTCGGAGGCGGGGAGGG 1682
*****

```

**Figure S2.** Multiple alignment of *WheatPME1* genes identified in *Triticum aestivum*, cv Chinese Spring in the corresponding A, B and D genomes. In yellow are highlighted the SNPs between the A/D and B genomes.
