# Supplementary material for: Cell wall traits as potential resources to improve resistance of durum wheat against Fusarium graminearum
Source: PubMed Central journal article supplement (PMC4298115; doi:10.1186/s12870-014-0369-1), 2015-01-19
Supplement: 12870_2014_369_MOESM4_ESM.pdf [file 12870_2014_369_MOESM4_ESM.pdf]

**Additional table 1** Primer pairs sequences for housekeeping and target genes

| Gene             | Forward Primer            | Reverse primer          | Product length (bp) | Melt peak (°C) |
|------------------|---------------------------|-------------------------|---------------------|----------------|
| <i>CDC</i>       | CAAATACGCCATCAGGGAGAACATC | CGCTGCCGAAACCACGAGAC    | 227                 | 86.5           |
| <i>RLI</i>       | CGATTCAGAGCAGCGTATTGTTG   | AGTTGGTCGGGTCTCTCTAAATG | 242                 | 80.0           |
| <i>ADP-RF</i>    | GACCACCATCCTCTACAAG       | AGCAGCACAGCATCAC        | 276                 | 84.5           |
| <i>WheatPME1</i> | TACTTGGGGATGAACTGCTC      | GAGATCGGCGCCTTCATC      | 150                 | 80.0           |
| <i>βTUB2</i>     | TGCTGTTCTGGTCGATCTTG      | CCCTGAAGGTGGTCACAGTT    | 170                 | 82.0           |
